# Supplementary material for: Reaction induced phase separation in thermosetting/thermosetting blends: effects of imidazole content on the phase separation of benzoxazine/epoxy blends
Source: Royal Society of Chemistry journal article supplement (doi:10.1039/c4ra10484f), 2014-01-01
Supplement: c4ra10484f1.pdf [file c4ra10484f1.pdf]

Supporting Information

# Reaction induced phase separation in thermosetting/thermosetting blends: Effects of imidazole content on the phase separation of benzoxazine/epoxy blends

*Pei Zhao††, Qian Zhou†, Yu Yuan Deng†, Rong Qi Zhu†, Yi Gu†\**

College of Polymer Sciences and Engineering, State Key Laboratory of Polymer  
Materials Engineering, Sichuan University, Chengdu 610065, P. R. China

---

**Table S1.** The peak temperature (° C) of BZ/ER/MZ blends with different content of

| $\beta$  | MZ     |        |        |        |        |        |
|----------|--------|--------|--------|--------|--------|--------|
|          | 3 wt%  |        | 8 wt%  |        | 12 wt% |        |
|          | Peak 2 | Peak 3 | Peak 2 | Peak 3 | Peak 2 | Peak 3 |
| 5°C/min  | 153.5  | 195.6  | 138.9  | 185.9  | 129.4  | 179.4  |
| 10°C/min | 166.9  | 205.4  | 151.3  | 197.1  | 141.6  | 190.4  |
| 15°C/min | 175.3  | 212.1  | 162.3  | 205.9  | 151.6  | 197.4  |
| 20°C/min | 180.4  | 220.0  | 167.7  | 208.5  | 157.1  | 202.4  |

---

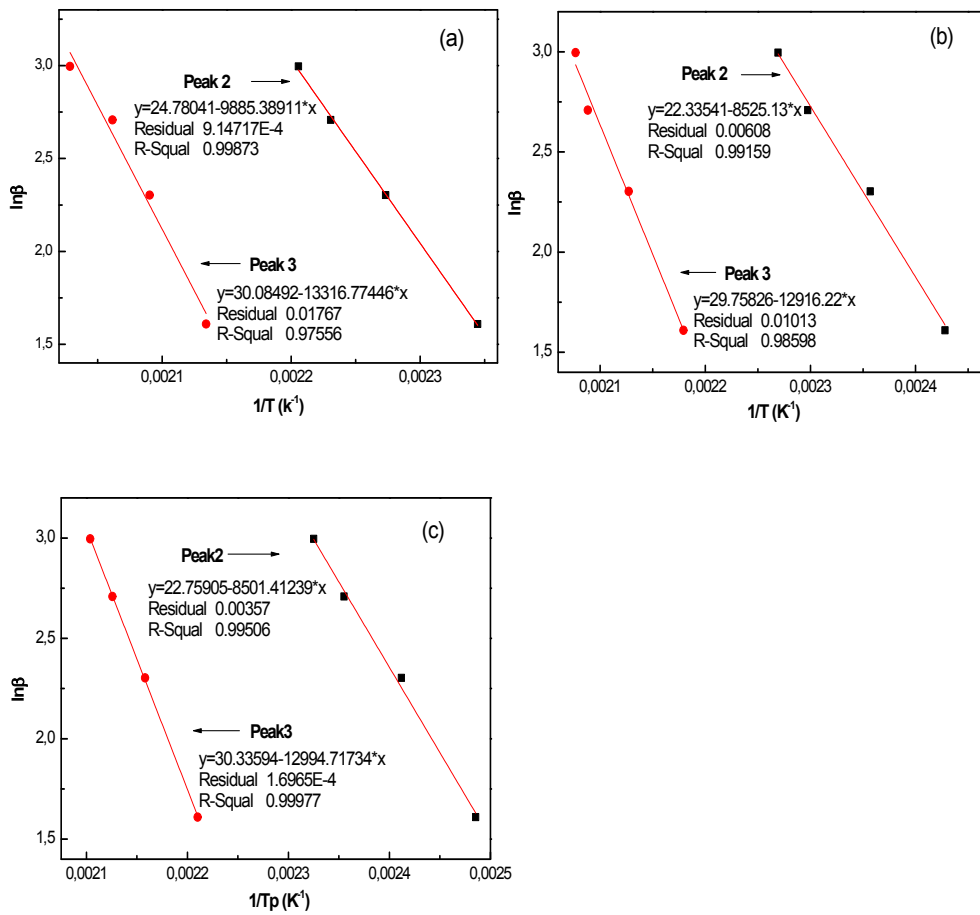

**Figure S1.** The Ozawa plot of  $\ln\beta$  vs.  $1/T$  for fitted Peak2 and Peak3 of BZ/ER/MZ blends with different content of MZ: (a) 3wt%, (b) 8wt% and (c) 12wt%.
